# Supplementary material
Source: Springer Nature journal article supplement (https://www.springermedizin.de/resource/supplementary/13012_2010_236_MOESM1_ESM.pdf/9629530)
Supplement: MOESM1 [file 9629530]

**30  
Regional  
Business  
Coalitions**

**Within Coalition**

**Pre-Presentation  
Baseline**

**DMW Presentation  
to 180  
Employers (VB)**

**HEDIS  
Presentation to 180  
Employers (UC)**

**Post-Presentation**

**12 months**

**24 months**
